# Supplementary material for: Selective catalytic oxidation of humins to carboxylic acids using the H4[PVMo11O40] Keggin-type polyoxometalate enhanced by alcohol doping and solubilizer
Source: Royal Society of Chemistry journal article supplement (doi:10.1039/d3re00672g), 2024-01-01
Supplement: d3re00672g1.pdf [file d3re00672g1.pdf]

## Supporting Information for

### **Selective catalytic oxidation of humins to carboxylic acids using the $H_4[PVMO_{11}O_{40}]$ Keggin-type polyoxometalate enhanced by alcohol doping and solubilizer**

Tobias Esser<sup>a</sup>, André Wassenberg<sup>a</sup>, Dorothea Voß<sup>a</sup> and Jakob Albert<sup>a\*</sup>

<sup>a</sup> Institute of Technical and Macromolecular Chemistry, Universität Hamburg, Bundesstraße 45, 20146 Hamburg, Germany

\*e-mail: [jakob.albert@uni-hamburg.de](mailto:jakob.albert@uni-hamburg.de)

This document contains 1 Table and 15 Figures on 10 pages.

## SCO of humins using the $H_4[PVMO_{11}O_{40}]$ Keggin-type polyoxometalate

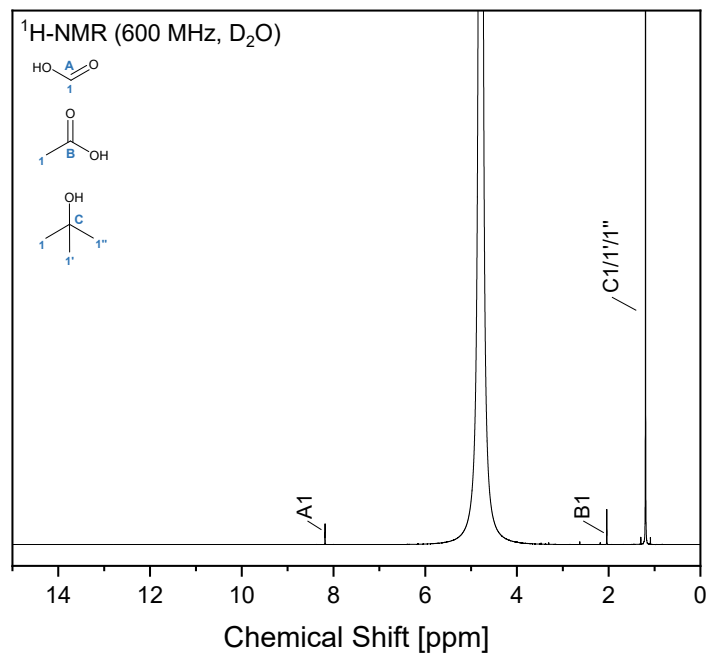

**Figure S1:** Exemplary  $^1H$ -NMR spectra (600 MHz,  $D_2O$ ) for the liquid product phase of the selective catalytic oxidation of humin using  $H_4[PVMO_{11}O_{40}]$  catalyst (HPA-1) in aqueous phase. *Experimental conditions:* 3-fold reaction system, 90 °C, 30 bar  $O_2$ , 30 h, 1000 rpm, 830 mmol of vanadium (V) for substitution in 30 mL water.

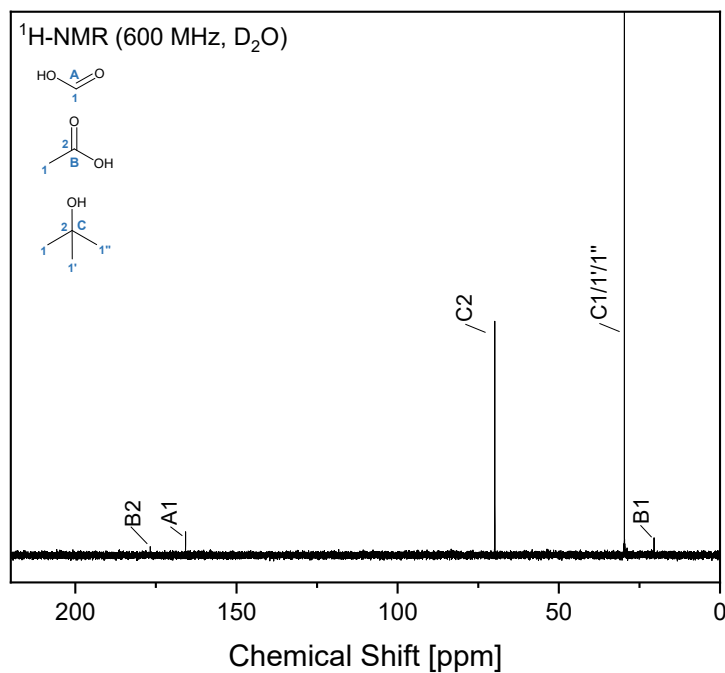

**Figure S2:** Exemplary  $^{13}C$ -NMR spectra (600 MHz,  $D_2O$ ) for the liquid product phase of the selective catalytic oxidation of humin using HPA-1 as catalyst in aqueous phase. *Experimental conditions:* 3-fold reaction system, 90 °C, 30 bar  $O_2$ , 30 h, 1000 rpm, 83 mmol of vanadium (V) for substitution in 30 mL water.

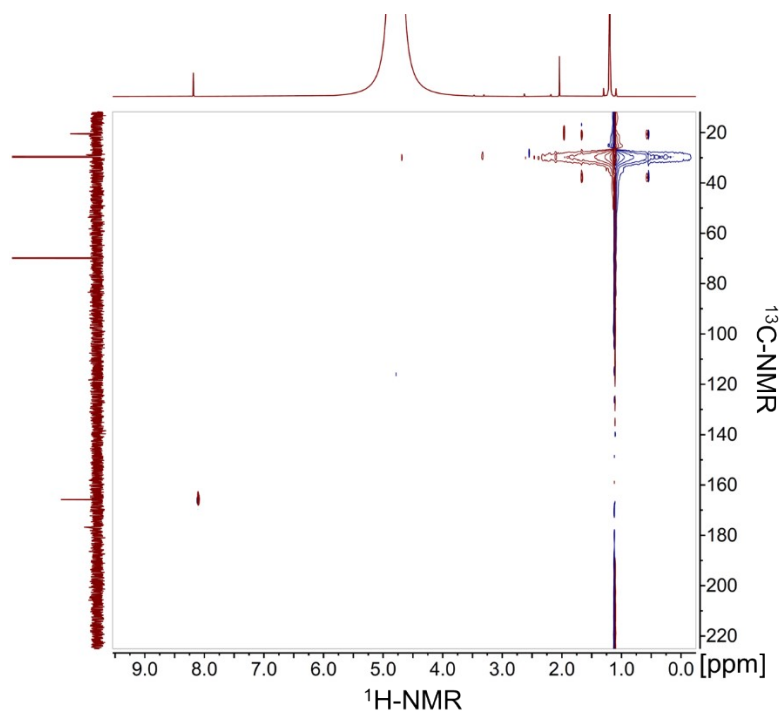

**Figure S3:** Exemplary HSQC spectra (600 MHz, D<sub>2</sub>O) for the liquid product phase of the selective catalytic oxidation of humin using HPA-1 as catalyst in aqueous phase. *Experimental conditions:* 3-fold reaction system, 90 °C, 30 bar O<sub>2</sub>, 30 h, 1000 rpm, 83 mmol of vanadium (V) for substitution in 30 mL water.

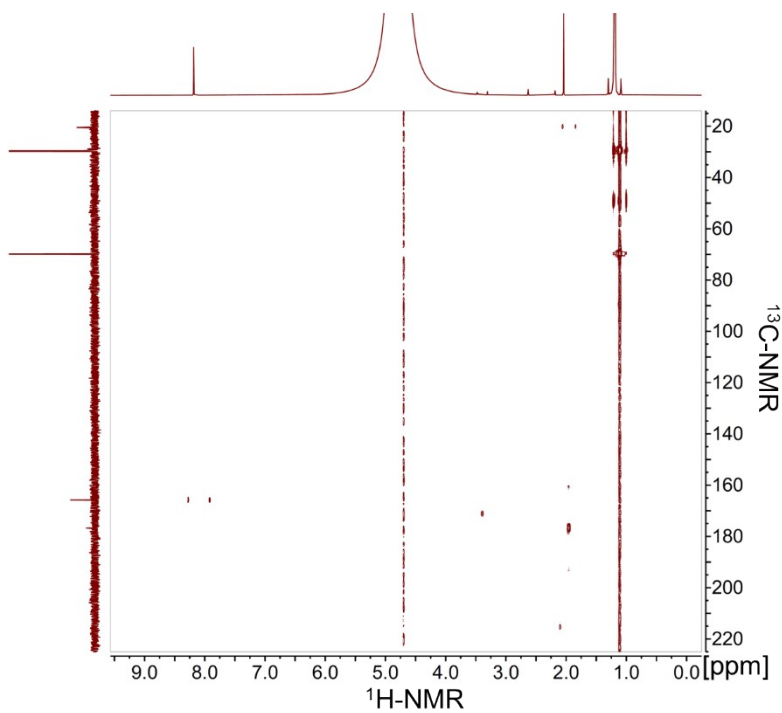

**Figure S4:** Exemplary HMBC spectra (600 MHz, D<sub>2</sub>O) for the liquid product phase of the selective catalytic oxidation of humin using HPA-1 as catalyst in aqueous phase. *Experimental conditions:* 3-fold reaction system, 90 °C, 30 bar O<sub>2</sub>, 30 h, 1000 rpm, 83 mmol of vanadium (V) for substitution in 30 mL water.

**Table S1:** Comparison of quantification via  $^1\text{H-NMR}$  and HPLC for the selective catalytic oxidation of humins using HPA-1 as catalyst in aqueous phase.

| Entry          | Catalyst                                    | Total Yield / %    |                   | Combined Yield / %<br>(FA + AA) |                   |
|----------------|---------------------------------------------|--------------------|-------------------|---------------------------------|-------------------|
|                |                                             | $^1\text{H-NMR}^b$ | HPLC <sup>c</sup> | $^1\text{H-NMR}^b$              | HPLC <sup>c</sup> |
| 1 <sup>a</sup> | Blank                                       | 11.2               | 11.3              | 3.2                             | 3.3               |
| 2 <sup>a</sup> | $\text{H}_4[\text{PVMo}_{11}\text{O}_{40}]$ | 30.1               | 29.8              | 10.9                            | 10.6              |

*Experimental Conditions:* a) 3-fold reaction system, 90 °C, 30 bar  $\text{O}_2$ , 30 h, 1000 rpm, 300 mg solid humin (16.20 mmol carbon), 0.83 mmol of vanadium (V) for substitution (20 mol<sub>Carbon</sub> mol<sup>-1</sup><sub>V</sub>) in 30 mL water, b) determined with quantitative  $^1\text{H-NMR}$  and tert.-butanol as standard, c) determined with HPLC according to the corresponding section of the experimental part.

### Selection of a suitable additive for the suppression of $\text{CO}_2$ formation in SCO of humins

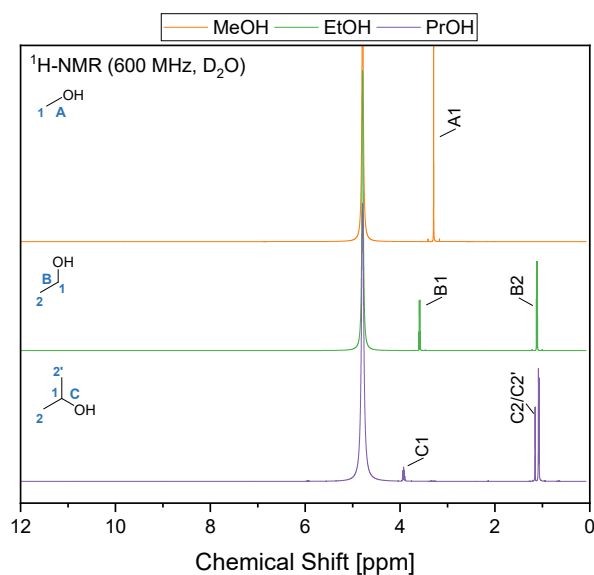

**Figure S5:**  $^1\text{H-NMR}$  spectra (600 MHz,  $\text{D}_2\text{O}$ ) for the liquid product phase of the additive stability experiments using HPA-1 as catalyst in alcohol-doped aqueous phase. *Experimental conditions:* 3-fold reaction system, 90 °C, 30 bar  $\text{O}_2$ , 30 h, 1000 rpm, 83 mmol of vanadium (V) for substitution in 30 mL of 10-vol.% aqueous solution of the respective alcohol.

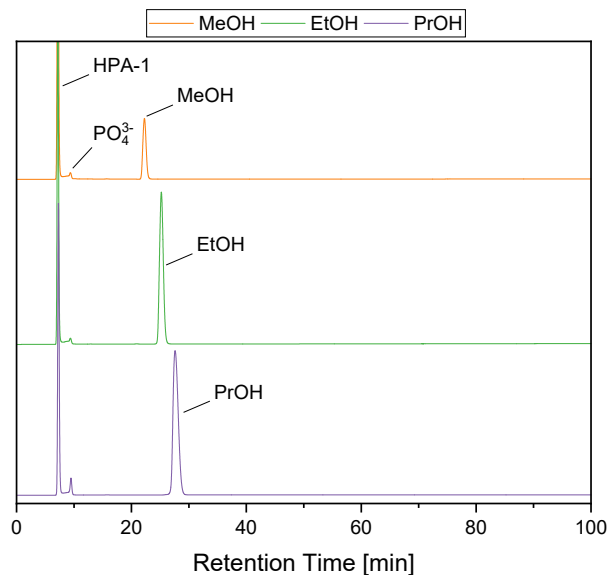

**Figure S6:** Chromatograms for the liquid product phase of the additive stability experiments using HPA-1 as catalyst in alcohol-doped aqueous phase. *Experimental conditions:* 3-fold reaction system, 90 °C, 30 bar O<sub>2</sub>, 30 h, 1000 rpm, 0.83 mmol of vanadium (V) for substitution in 30 mL of 10-vol.% aqueous solution of the respective alcohol.

### The effect of para-toluene sulfonic acid as solubilizer on the SCO of humins

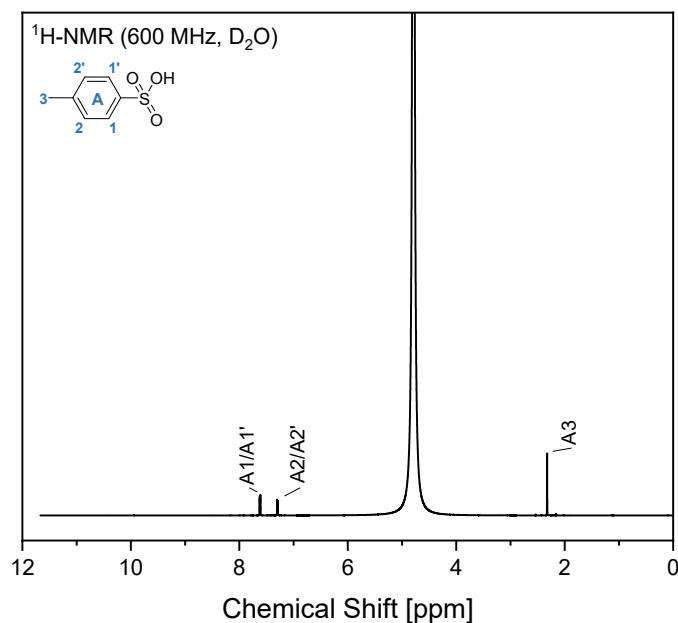

**Figure S7:** <sup>1</sup>H-NMR spectra (600 MHz, D<sub>2</sub>O) for the liquid product phase of the pTSA stability experiment using HPA-1 as catalyst in aqueous phase. *Experimental conditions:* 3-fold reaction system, 90 °C, 30 bar O<sub>2</sub>, 30 h, 1000 rpm, 0.83 mmol of vanadium (V) for substitution and 3.0 mmol pTSA in 30 mL aqueous phase.

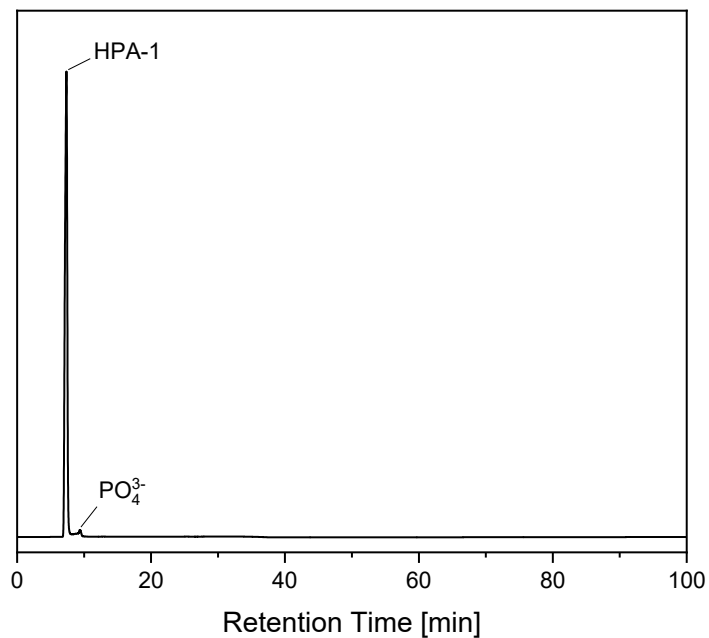

**Figure S8:** Chromatogram for the liquid product phase of the pTSA stability experiment using HPA-1 as catalyst in aqueous phase. *Experimental conditions:* 3-fold reaction system, 90 °C, 30 bar O<sub>2</sub>, 30 h, 1000 rpm, 0.83 mmol of vanadium (V) for substitution and 3.0 mmol pTSA in 30 mL aqueous phase.

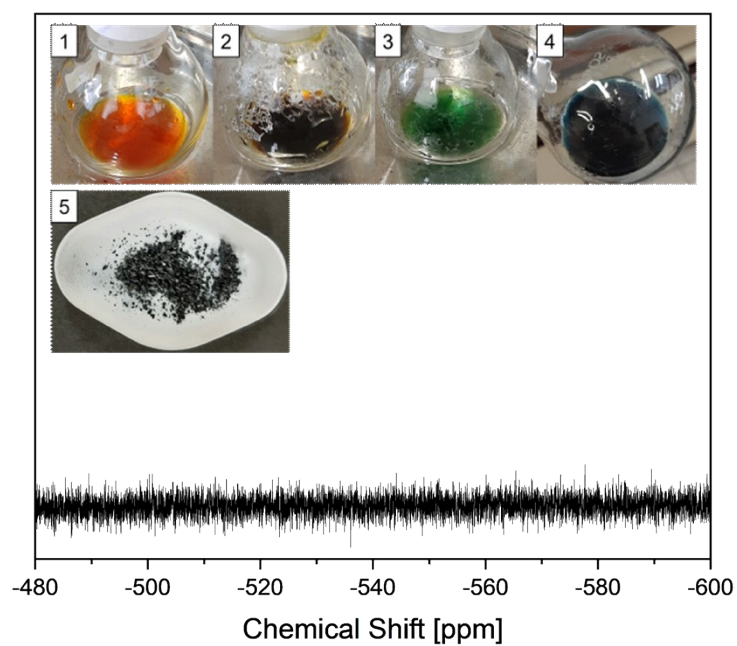

**Figure S9:** <sup>51</sup>V-NMR spectra (600 MHz, D<sub>2</sub>O) for the reduced HPA-1 catalyst in aqueous phase.

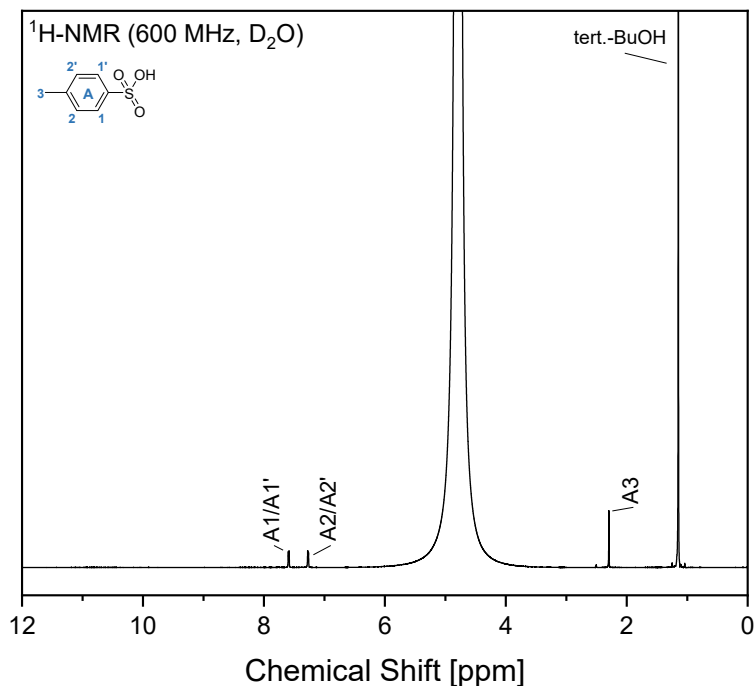

**Figure S 10:** <sup>1</sup>H-NMR spectra (600 MHz, D<sub>2</sub>O) for the liquid product phase of the pTSA stability experiment using fully reduced HPA-1 blue as catalyst in aqueous phase. *Experimental conditions:* 3-fold reaction system, 90 °C, 30 bar O<sub>2</sub>, 30 h, 1000 rpm, 0.83 mmol of vanadium (V) for substitution and 3.0 mmol pTSA in 30 mL aqueous phase.

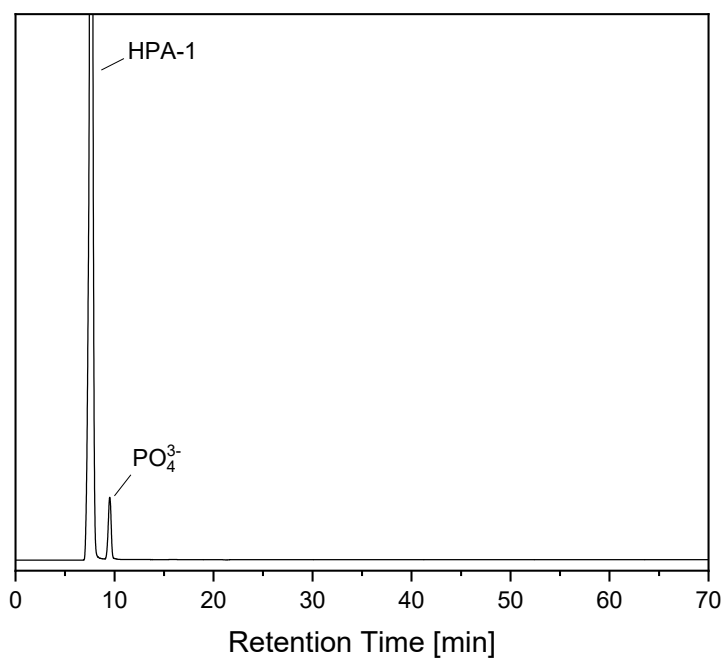

**Figure S 11:** Chromatogram for the liquid product phase of the pTSA stability experiment using fully reduced HPA-1 blue as catalyst in aqueous phase. *Experimental conditions:* 3-fold reaction system, 90 °C, 30 bar O<sub>2</sub>, 30 h, 1000 rpm, 0.83 mmol of vanadium (V) for substitution and 3.0 mmol pTSA in 30 mL aqueous phase.

## Optimization of SCO of humins by synergetic combination of MeOH and pTSA

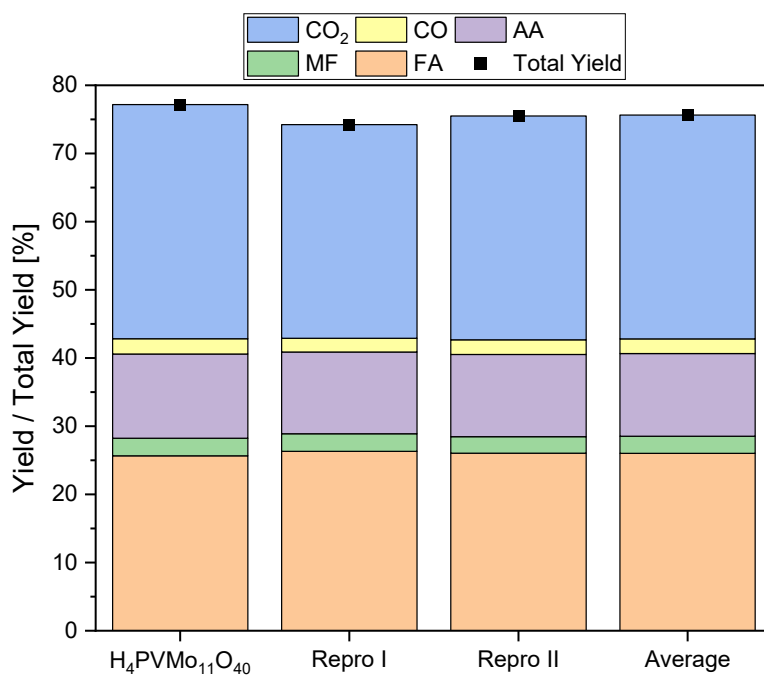

**Figure S12:** Reproduction for selective catalytic oxidation of humin using HPA-1 as catalyst in aqueous methanol solution with pTSA (combined system). *Experimental conditions:* 3-fold reaction system, 120 °C, 30 bar O<sub>2</sub>, 30 h, 1000 rpm, 300 mg solid solid humin (16.20 mmol carbon), 0.83 mmol of vanadium (V) for substitution (20 mol<sub>Carbon</sub> mol<sup>-1</sup><sub>V</sub>) in 5 vol.-% methanol with 1.5 mmol pTSA.

### Catalyst characterization

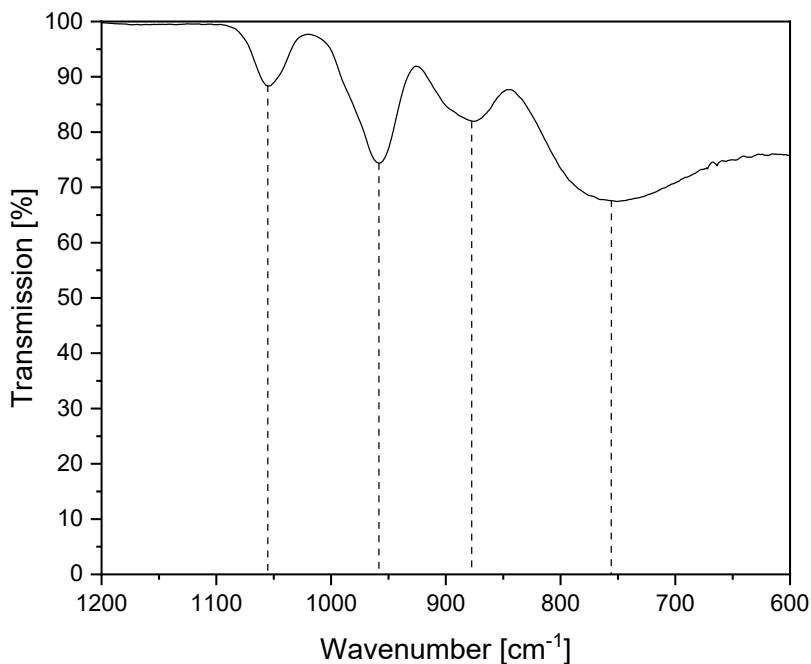

**Figure S13:** FT-IR (ATR) spectrum of the H<sub>4</sub>[PVMo<sub>11</sub>O<sub>40</sub>] POM-catalyst. Vibration modes: 1055 cm<sup>-1</sup> (P-O), 958 cm<sup>-1</sup> (M=O<sub>i</sub>), 877 cm<sup>-1</sup> ((M-O-M)<sub>vertex</sub>), 756 cm<sup>-1</sup> ((M-O-M)<sub>edge</sub>).<sup>1</sup>



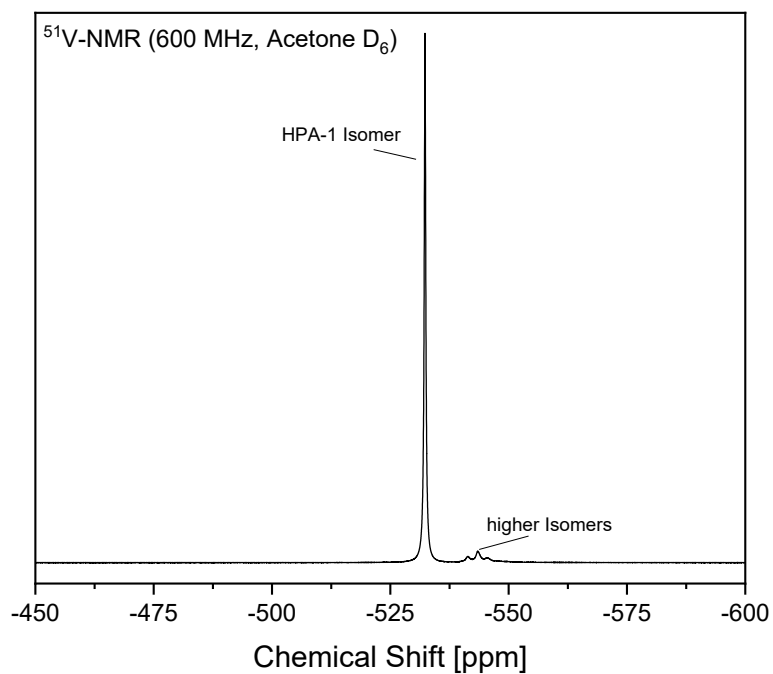

**Figure S14:** <sup>51</sup>V NMR spectrum of the H<sub>4</sub>[PVMo<sub>11</sub>O<sub>40</sub>] POM-catalyst in a mixture of 90 % H<sub>2</sub>O (pH 1) and 10 % acetone-*d*<sub>6</sub>. NaVO<sub>3</sub> was used as external standard.

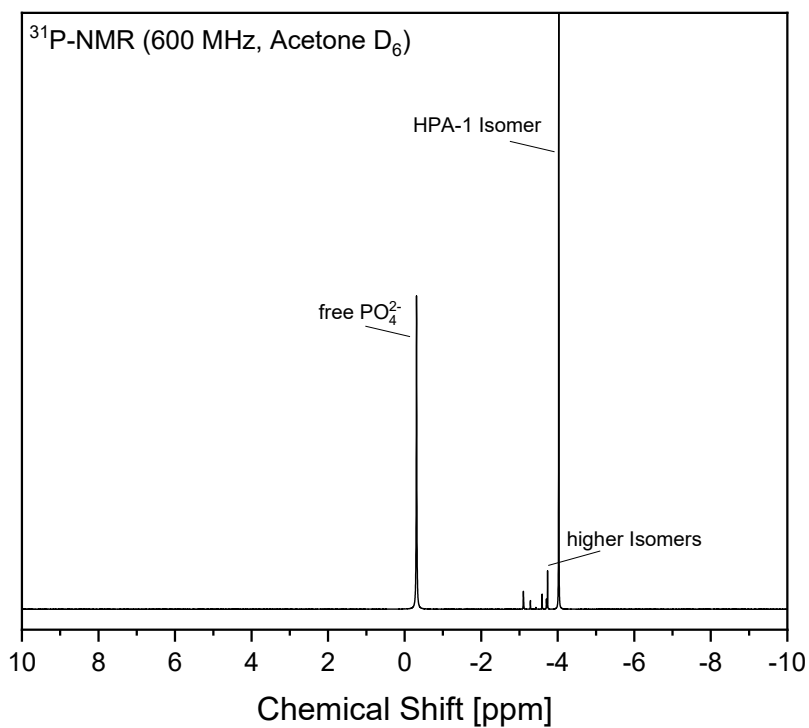

**Figure S15:** <sup>31</sup>P NMR spectrum of the H<sub>4</sub>[PVMo<sub>11</sub>O<sub>40</sub>] POM-catalyst in a mixture of 90 % H<sub>2</sub>O (pH 1) and 10 % acetone-*d*<sub>6</sub>. 85 % H<sub>3</sub>PO<sub>4</sub> was used as external standard.

## References

- 1 J. K. Lee, J. Melsheimer, S. Berndt, G. Mestl, R. Schlögl and K. Köhler, *Applied Catalysis A: General*, 2001, **214**, 125–148.
